# Supplementary material
Source: HighWire-hosted journal article supplement (https://erj.ersjournals.com/content/61/4/2201514)
Supplement: inline-supplementary-material-1 [file inline-supplementary-material-1.pdf]

## Supplementary Materials

**Table S1.** In-hospital use of concomitant medications.

|                                     | MP<br>(n=337) | DM<br>(n=340) | p-value* |
|-------------------------------------|---------------|---------------|----------|
| Anticoagulants, No. (%)             |               |               |          |
| LMWH prophylactic dose <sup>†</sup> | 271 (80.4)    | 266 (78.2)    | 0.36     |
| LMWH therapeutic dose <sup>‡</sup>  | 88 (26.1)     | 74 (21.8)     | 0.38     |
| UFH prophylactic dose <sup>§</sup>  | 1 (0.3)       | 2 (0.6)       | 0.85     |
| UFH therapeutic dose <sup>  </sup>  | 1 (0.3)       | 1 (0.3)       | 0.98     |
| Warfarin <sup>¶</sup>               | 2 (0.6)       | 4 (1.2)       | 0.56     |
| DOAC**                              | 13 (3.9)      | 12 (3.5)      | 0.87     |
| Other treatments, No. (%)           |               |               |          |
| Tocilizumab                         | 30 (8.9)      | 24 (7.1)      | 0.38     |
| Remdesivir                          | 75 (22.3)     | 66 (19.4)     | 0.36     |
| Baricitinib                         | 14 (4.2)      | 17 (5.0)      | 0.60     |
| Anakinra                            | 2 (0.6)       | 3 (0.9)       | 0.67     |
| Casirivimab + Imdevimab             | 9 (2.7)       | 12 (3.5)      | 0.52     |
| Sarilumab                           | 0 (0.0)       | 2 (0.6)       | 0.16     |
| Monoclonal antibodies               | 0 (0.0)       | 1 (0.3)       | 0.32     |

Abbreviations: LMWH, low molecular weight heparin; UFH, unfractionated heparin; DOAC, direct oral anticoagulants.

\* P value of the Fisher exact test for dichotomous variables, unpaired Student t test or Wilcoxon; rank-sum test for numerical variables, as appropriate.

<sup>†</sup> Missing data: 5 MP, 9 DM.

<sup>‡</sup> Missing data: 9 MP, 10 DM.

<sup>§</sup> Missing data: 12 MP, 11 DM.

<sup>||</sup> Missing data: 13 MP, 12 DM.

<sup>¶</sup> Missing data: 9 MP, 10 DM.

\*\* Missing data: 10 MP, 9 DM.

**Table S2.** Stratification of MV-free days at 28 days according to the severity of respiratory impairment at randomisation.

| Stratification variable                       | Intention-to-treat analysis |             |          | Per-protocol analysis |             |          |
|-----------------------------------------------|-----------------------------|-------------|----------|-----------------------|-------------|----------|
|                                               | MP                          | DM          | p-value* | MP                    | DM          | p-value* |
|                                               | <i>Median (IQR)</i>         |             |          | <i>Median (IQR)</i>   |             |          |
| None                                          | 23.0 (14.0)                 | 24.0 (16.0) | 0.49     | 24.0 (10.0)           | 26.0 (8.0)  | 0.09     |
| PaO <sub>2</sub> :FiO <sub>2</sub> ≥ 200 mmHg | 28.0 (7.0)                  | 28.0 (6.0)  | 0.96     | 28.0 (6.0)            | 28.0 (5.0)  | 0.93     |
| PaO <sub>2</sub> :FiO <sub>2</sub> < 200 mmHg | 19.0 (25.0)                 | 19.5 (26.0) | 0.70     | 21.0 (10.0)           | 22.0 (13.0) | 0.39     |
| Low-flow oxygen                               | 28.0 (6.0)                  | 28.0 (5.0)  | 0.80     | 28.0 (4.0)            | 28.0 (3.0)  | 0.78     |
| HFNC                                          | 22.0 (11.0)                 | 21.5 (28.0) | 0.40     | 22.5 (10.0)           | 24.0 (14.0) | 0.98     |
| NIV                                           | 16.5 (23.0)                 | 19.0 (23.0) | 0.41     | 20.0 (14.0)           | 21.0 (9.0)  | 0.19     |

Abbreviations: IQR, interquartile range; PaO<sub>2</sub>:FiO<sub>2</sub>, ratio of partial pressure of arterial oxygen (PaO<sub>2</sub> in mmHg) to fractional inspired oxygen (FiO<sub>2</sub>); HFNC, high-flow nasal cannula; NIV, noninvasive ventilation.

\* P-value of the Wilcoxon rank-sum test.

**Table S3.** Odds of ICU referral according to the severity of respiratory impairment at randomisation.

| Stratification variable                       | Intention-to-treat analysis              |                                          |                  |          | Per-protocol analysis                    |                                          |                  |          |
|-----------------------------------------------|------------------------------------------|------------------------------------------|------------------|----------|------------------------------------------|------------------------------------------|------------------|----------|
|                                               | MP<br><i>no. of events/total no. (%)</i> | DM<br><i>no. of events/total no. (%)</i> | OR<br>(95% CI)   | p-value* | MP<br><i>no. of events/total no. (%)</i> | DM<br><i>no. of events/total no. (%)</i> | OR<br>(95% CI)   | p-value* |
| None                                          | 41/337 (12.2)                            | 45/340 (13.2)                            | 0.91 (0.58-1.43) | 0.68     | 7/279 (2.1)                              | 19/286 (5.6)                             | 0.36 (0.15-0.87) | 0.02     |
| PaO <sub>2</sub> :FiO <sub>2</sub> ≥ 200 mmHg | 11/150 (7.3)                             | 12/174 (6.9)                             | 1.07 (0.46-2.50) | 0.88     | 2/123 (1.6)                              | 5/156 (3.2)                              | 0.50 (0.10-2.62) | 0.41     |
| PaO <sub>2</sub> :FiO <sub>2</sub> < 200 mmHg | 29/184 (15.8)                            | 32/163 (19.6)                            | 0.77 (0.44-1.33) | 0.34     | 5/154 (3.2)                              | 13/128 (10.2)                            | 0.30 (0.10-0.86) | 0.03     |
| Low-flow oxygen                               | 9/142 (6.3)                              | 12/174 (6.9)                             | 0.91 (0.37-2.23) | 0.84     | 2/122 (1.6)                              | 5/157 (3.2)                              | 0.51 (0.97-2.66) | 0.42     |
| HFNC                                          | 6/74 (8.1)                               | 8/45 (17.8)                              | 0.41 (0.13-1.26) | 0.12     | 2/66 (3.0)                               | 5/38 (13.16)                             | 0.21 (0.04-1.12) | 0.07     |
| NIV                                           | 26/120 (21.7)                            | 25/118 (21.2)                            | 1.03 (0.55-1.91) | 0.93     | 3/90 (3.3)                               | 9/89 (10.1)                              | 0.31 (0.08-1.17) | 0.08     |

Abbreviations: PaO<sub>2</sub>:FiO<sub>2</sub>, ratio of partial pressure of arterial oxygen (PaO<sub>2</sub> in mmHg) to fractional inspired oxygen (FiO<sub>2</sub>); HFNC, high-flow nasal cannula; NIV, noninvasive ventilation.

\* Odds-ratio of event among MP group vs DM group, estimated using logistic regression model.

**Table S4.** Stratification of the number of hospitalization days among survivors, according to the severity of respiratory impairment at randomisation.

| Stratification variable                       | Intention-to-treat analysis |             |          | Per-protocol analysis |             |          |
|-----------------------------------------------|-----------------------------|-------------|----------|-----------------------|-------------|----------|
|                                               | MP                          | DM          | p-value* | MP                    | DM          | p-value* |
|                                               | <i>Median (IQR)</i>         |             |          | <i>Median (IQR)</i>   |             |          |
| None                                          | 15.0 (11.0)                 | 14.0 (11.0) | 0.005    | 15.0 (10.0)           | 13.0 (10.0) | 0.001    |
| PaO <sub>2</sub> :FiO <sub>2</sub> ≥ 200 mmHg | 14.0 (10.0)                 | 12.0 (9.0)  | 0.006    | 14.0 (10.0)           | 12.0 (9.0)  | 0.009    |
| PaO <sub>2</sub> :FiO <sub>2</sub> < 200 mmHg | 17.0 (13.0)                 | 16.0 (14.0) | 0.55     | 18.0 (11.0)           | 15.5 (13.0) | 0.21     |
| Low-flow oxygen                               | 14.0 (10.0)                 | 12.0 (9.0)  | 0.003    | 14.0 (9.0)            | 12.0 (8.0)  | 0.001    |
| HFNC                                          | 17.0 (12.0)                 | 12.0 (14.0) | 0.09     | 17.0 (11.0)           | 12.0 (12.0) | 0.06     |
| NIV                                           | 18.0 (11.0)                 | 18.0 (12.0) | 0.78     | 17.0 (9.0)            | 17.0 (8.0)  | 0.96     |

Abbreviations: IQR, interquartile range; PaO<sub>2</sub>:FiO<sub>2</sub>, ratio of partial pressure of arterial oxygen (PaO<sub>2</sub> in mmHg) to fractional inspired oxygen (FiO<sub>2</sub>); HFNC, high-flow nasal cannula; NIV, noninvasive ventilation.

\* P-value of the Wilcoxon rank-sum test.

**Table S5.** Score of the WHO clinical progression scale at days 3, 7 and 14, median (IQR)

|        | MP (n=325) | DM (n=326) | p-value* |
|--------|------------|------------|----------|
| Day 3  | 6 (1)      | 6 (1)      | 0.19     |
| Day 7  | 6 (1)      | 6 (1)      | 0.05     |
| Day 14 | 5 (5)      | 4 (5)      | 0.09     |

\*P-value of the Mann-Whitney test

**Table S6.** Description of the WHO clinical progression scale by score at days 3, 7 and 14, No. (%)

|     | Day 3      |            | Day 7      |            | Day 14     |            |
|-----|------------|------------|------------|------------|------------|------------|
|     | MP (n=325) | DM (n=326) | MP (n=300) | DM (n=303) | MP (n=298) | DM (n=305) |
| < 4 | 0 (0.0)    | 2 (0.6)    | 10 (3.3)   | 23 (7.6)   | 93 (31.2)  | 131 (43.0) |
| 4   | 6 (1.9)    | 13 (4.0)   | 16 (5.3)   | 33 (10.9)  | 46 (15.4)  | 36 (11.8)  |
| 5   | 88 (27.1)  | 94 (28.8)  | 105 (35.0) | 95 (31.4)  | 83 (27.9)  | 56 (18.4)  |
| 6   | 225 (69.2) | 210 (64.4) | 149 (49.7) | 127 (41.9) | 44 (14.8)  | 42 (13.8)  |
| 7   | 3 (0.9)    | 1 (0.3)    | 4 (1.3)    | 6 (2.0)    | 5 (1.7)    | 5 (1.6)    |
| 8   | 1 (0.3)    | 2 (0.6)    | 5 (1.7)    | 3 (1.0)    | 4 (1.3)    | 3 (1.0)    |
| 9   | 0 (0.0)    | 2 (0.6)    | 0 (0.0)    | 1 (0.3)    | 1 (0.3)    | 1 (0.3)    |
| 10  | 2 (0.6)    | 2 (0.6)    | 11 (3.7)   | 15 (5.0)   | 22 (7.4)   | 31 (10.2)  |

Legend to the WHO clinical progression scale:

< 4 = non hospitalized

4 = hospitalized, no oxygen therapy

5 = hospitalized, oxygen by mask or nasal prongs

6 = hospitalized, oxygen by NIV or high flow

7 = intubation and mechanical ventilation, PaO<sub>2</sub>:FiO<sub>2</sub> ≥ 150

8 = mechanical ventilation, PaO<sub>2</sub>:FiO<sub>2</sub> < 150 or vasopressors

9 = mechanical ventilation, PaO<sub>2</sub>:FiO<sub>2</sub> < 150 and vasopressors, dialysis or ECMO

**Table S7.** Adverse events related to the study treatment, No. (%)

|                                | MP<br>(n=337) | DM<br>(n=340) | p-value* |
|--------------------------------|---------------|---------------|----------|
| Anaphylaxis <sup>†</sup>       | 0 (0.0)       | 0 (0.0)       | 1.00     |
| Agitation <sup>‡</sup>         | 34 (10.1)     | 30 (8.8)      | 0.73     |
| Psychosis <sup>§</sup>         | 11 (3.3)      | 5 (1.5)       | 0.30     |
| Insomnia <sup>  </sup>         | 47 (13.9)     | 40 (11.8)     | 0.47     |
| Hyperglycemia <sup>¶</sup>     | 113 (33.5)    | 93 (27.4)     | 0.15     |
| Any of the above <sup>**</sup> | 147 (43.6)    | 126 (37.0)    | 0.08     |

\* P value of the Fisher exact test for dichotomous variables.

<sup>†</sup> Missing data: 8 MP, 9 DM.

<sup>‡</sup> Missing data: 12 MP, 14 DM.

<sup>§</sup> Missing data: 14 MP, 13 DM.

<sup>||</sup> Missing data: 19 MP, 13 DM.

<sup>¶</sup> Missing data: 20 MP, 16 DM.

<sup>\*\*</sup> Missing data: 1 MP, 0 DM.

**Table S8.** In-hospital complications, No. (%)

|                                           | MP<br>(n=337) | DM<br>(n=340) | p-value* |
|-------------------------------------------|---------------|---------------|----------|
| Bradycardia <sup>†</sup>                  | 31 (9.2)      | 24 (7.1)      | 0.51     |
| Diarrhea <sup>‡</sup>                     | 13 (3.9)      | 16 (4.7)      | 0.82     |
| Elevation of liver enzymes <sup>§</sup>   | 85 (25.2)     | 89 (26.2)     | 0.89     |
| Hypokalemia <sup>  </sup>                 | 19 (5.6)      | 17 (5.0)      | 0.67     |
| Shock requiring vasopressors <sup>¶</sup> | 3 (0.9)       | 5 (1.5)       | 0.59     |
| Acute kidney injury <sup>**</sup>         | 23 (6.8)      | 26 (7.6)      | 0.67     |
| Disseminated intravascular coagulation    | 15 (4.5)      | 14 (4.1)      | 0.83     |
| Acute myocardial infarction <sup>††</sup> | 0 (0.0)       | 1 (0.3)       | 0.61     |
| Stroke <sup>‡‡</sup>                      | 1 (0.3)       | 0 (0.0)       | 0.50     |
| Atrial fibrillation <sup>§§</sup>         | 9 (2.8)       | 5 (1.5)       | 0.39     |
| Pulmonary embolism <sup>   </sup>         | 21 (6.2)      | 18 (5.3)      | 0.73     |
| Bacterial superinfection <sup>¶¶</sup>    | 46 (13.6)     | 49 (14.4)     | 0.94     |
| Pneumothorax                              | 2 (0.6)       | 2 (0.6)       | 0.99     |
| Pneumomediastinum                         | 7 (2.1)       | 4 (1.2)       | 0.35     |
| Deep vein thrombosis                      | 1 (0.3)       | 0 (0.0)       | 0.32     |
| Bleeding                                  | 8 (2.4)       | 3 (0.9)       | 0.12     |
| Any of the above                          | 169 (50.1)    | 158 (46.5)    | 0.36     |

\* P value of the Fisher exact test for dichotomous variables.

<sup>†</sup> Missing data: 19 MP, 22 DM.

<sup>‡</sup> Missing data: 18 MP, 20 DM.

<sup>§</sup> Missing data: 15 MP, 13 DM.

<sup>||</sup> Missing data: 16 MP, 12 DM.

<sup>¶</sup> Missing data: 17 MP, 13 DM.

<sup>\*\*</sup> Missing data: 15 MP, 11 DM.

<sup>††</sup> Missing data: 15 MP, 15 DM.

<sup>‡‡</sup> Missing data: 15 MP, 13 DM.

<sup>§§</sup> Missing data: 16 MP, 12 DM.

<sup>|||</sup> Missing data: 20 MP, 16 DM.

<sup>¶¶</sup> Missing data: 15 MP, 15 DM.

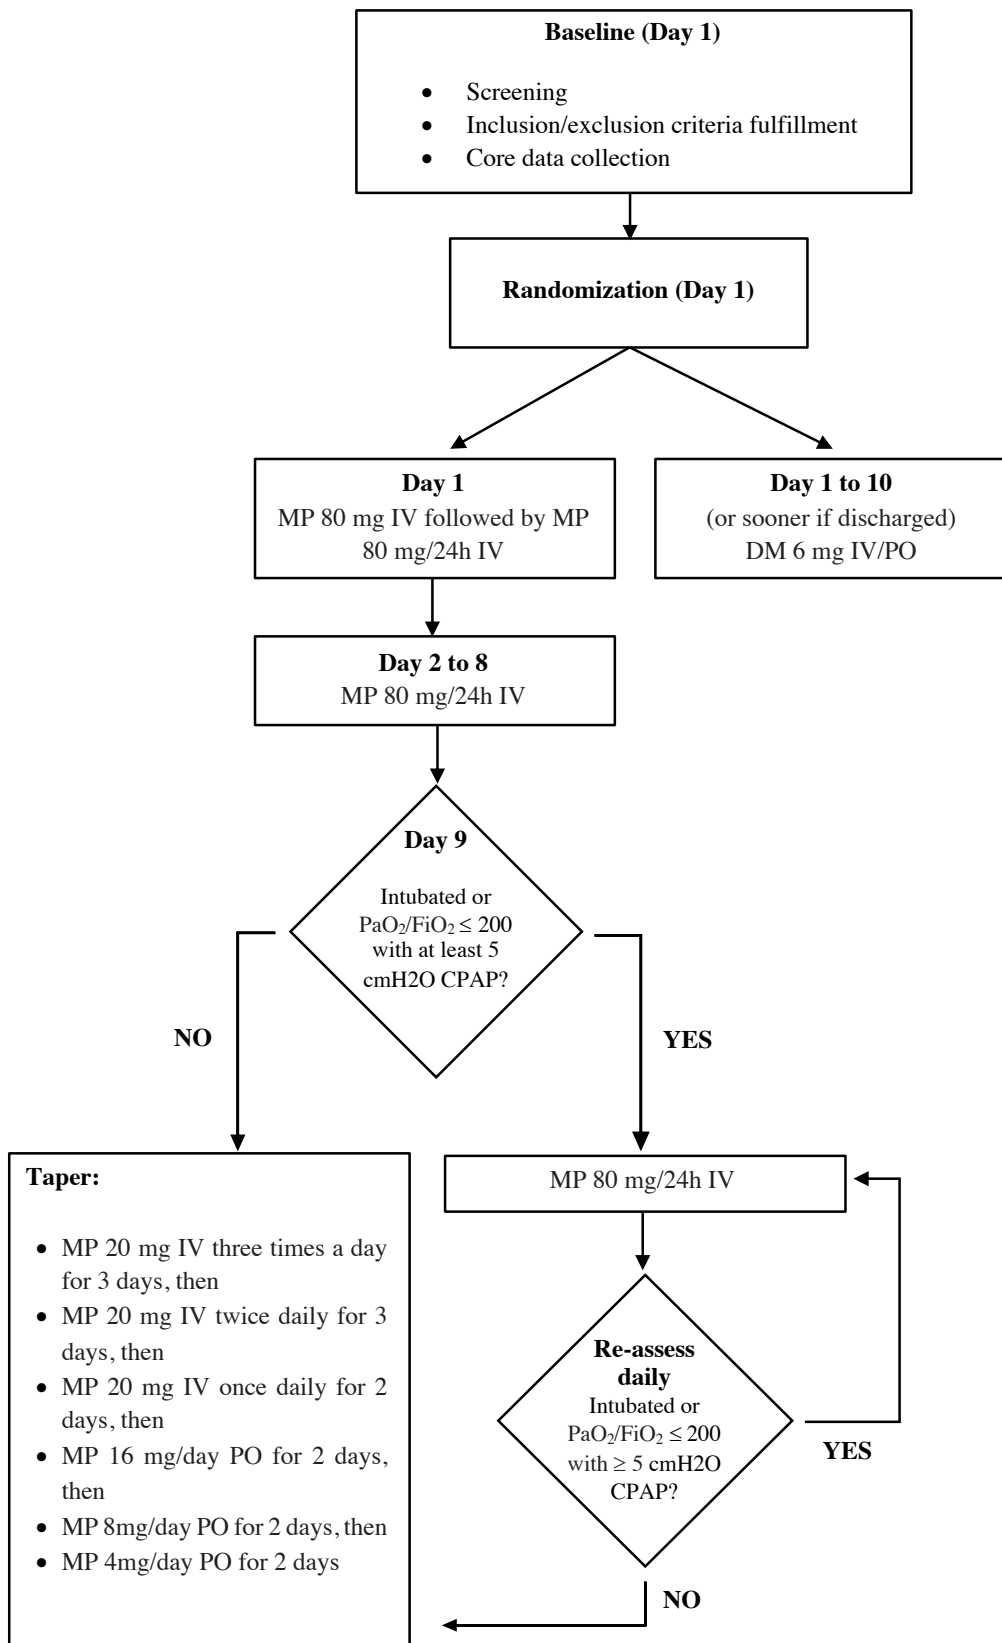

**Figure S1.** Flow-chart of the treatment schedule in both arms.



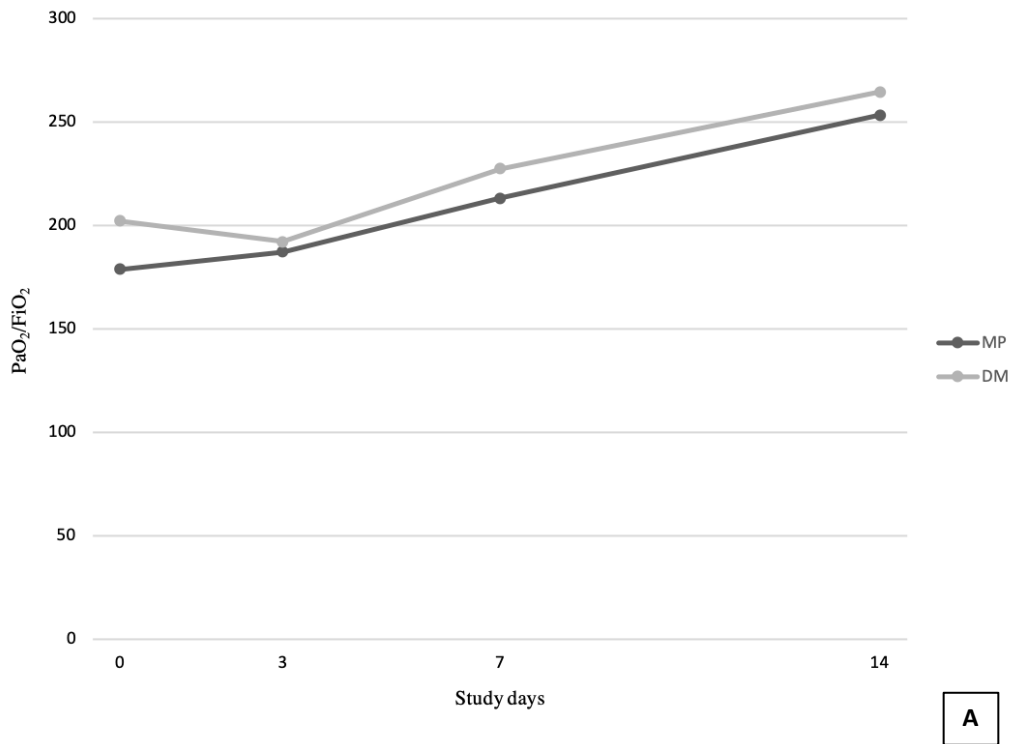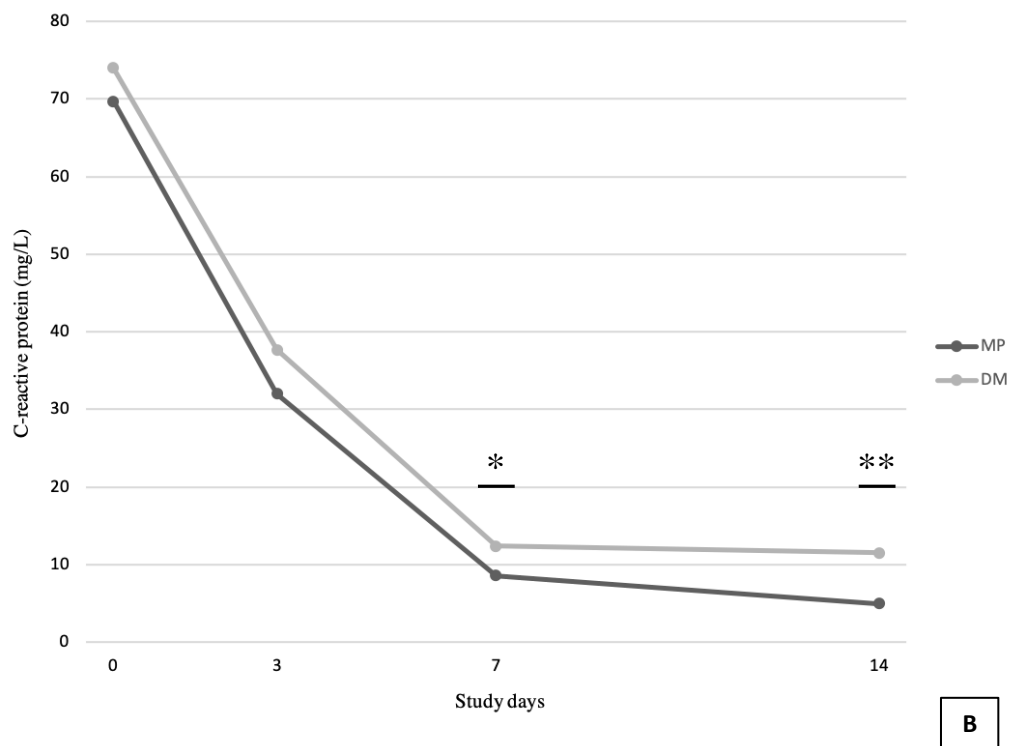

**Figure S2.** Panel A: time-course of PaO<sub>2</sub>:FiO<sub>2</sub> variation. Panel B: time course of C-reactive protein variation, showing significant differences at days 7 (\*,  $p = 0.006$ ) and 14 (\*\*,  $p = 0.0001$ ).

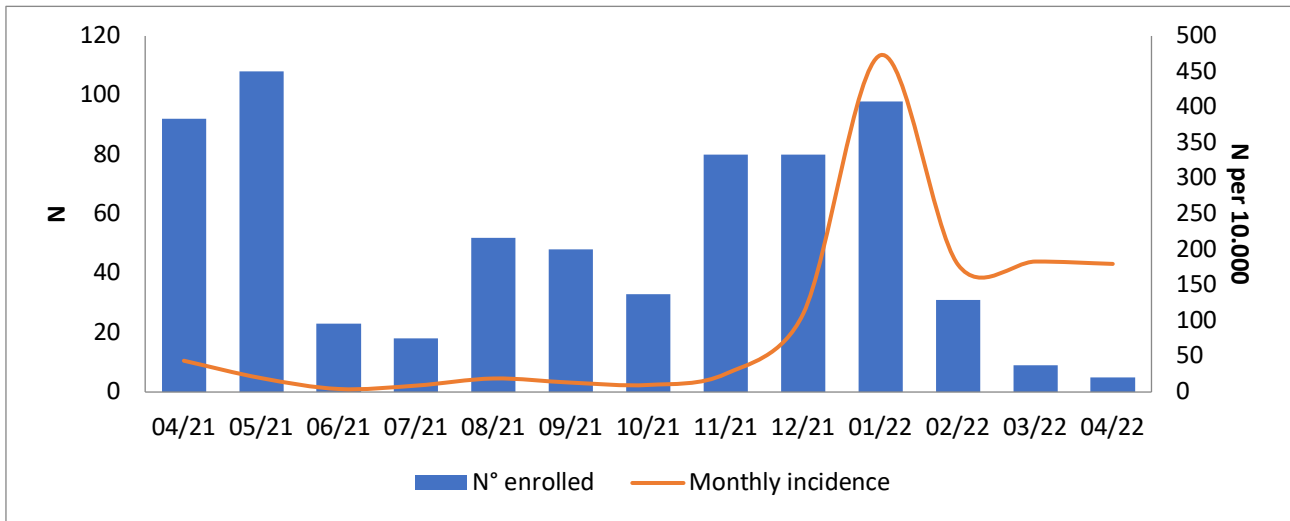

**Figure S3.** Distribution of the number of enrolled patients per month (blue bars) and incidence of new COVID-19 cases in Italy (orange line).

## Supplementary statistical methods

### Sequential design procedures

Stopping rules for either futility or efficacy are bound to specific error spending function according to a Fisher's exact test calculated on primary outcome. Preplanned critical values and plots are reported in table S9 and figure S4.

**Table S9.** Preplanned critical values (Fisher test) for application of early stopping rules.

|                      | $H_0: \pi_T - \pi_C = 0$ |         |         |
|----------------------|--------------------------|---------|---------|
| Critical values      | Stage 1                  | Stage 2 | Stage 3 |
| Reject H0 (Efficacy) | 3.421                    | 2.419   | 1.975   |
| Accept H0 (Futility) | -0.695                   | 1.002   | 1.975   |
| Information rate     | 0.333                    | 0.667   | 1       |
| alpha spent          | 0.0003                   | 0.0079  | 0.025   |

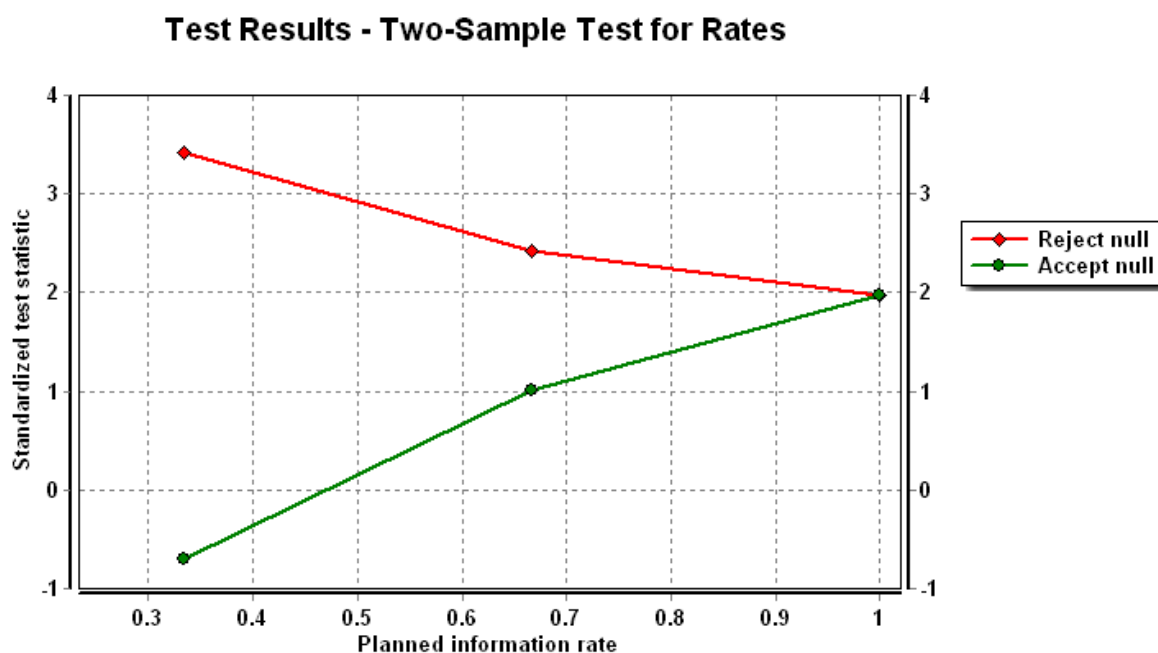

$K = 3$ ;  $\alpha = 0.025$ , one-sided, binding futility =  $(-0.695, 1.002)$ ,  $\Delta = 0$  (O'Brien and Fleming design).

**Figure S4.** Graphical plot for the application of early stopping rule. Uncertainty area (i.e.  $H_0$  is neither accepted nor rejected) lies above the green line and below the red lines.

### Sample size

Minimum and maximum sample size will significantly change according to the observed effect within the trial sample (expected average sample size is between 200 and 680 participants). In particular, we expect to enroll 100 participants per arm at the first stage and then between 15 and 175 per arm for each eventual stage if the stopping rules were not met. The actual number of new participants in each

arm will be calculated according to the maximum likelihood estimates on observed efficacy at each interim analysis with an overall conditional power for next stage equal to 90%. This approach allows either to minimize the number of enrolled participants if the experimental hypothesis is too conservative or to have a good power level if the experimental hypothesis is too optimistic. The average sample size with relative power and the overall probability for meeting stopping rules according to different level of efficacy of arm 1 vs. arm 2 are reported in figures S5 and S6.

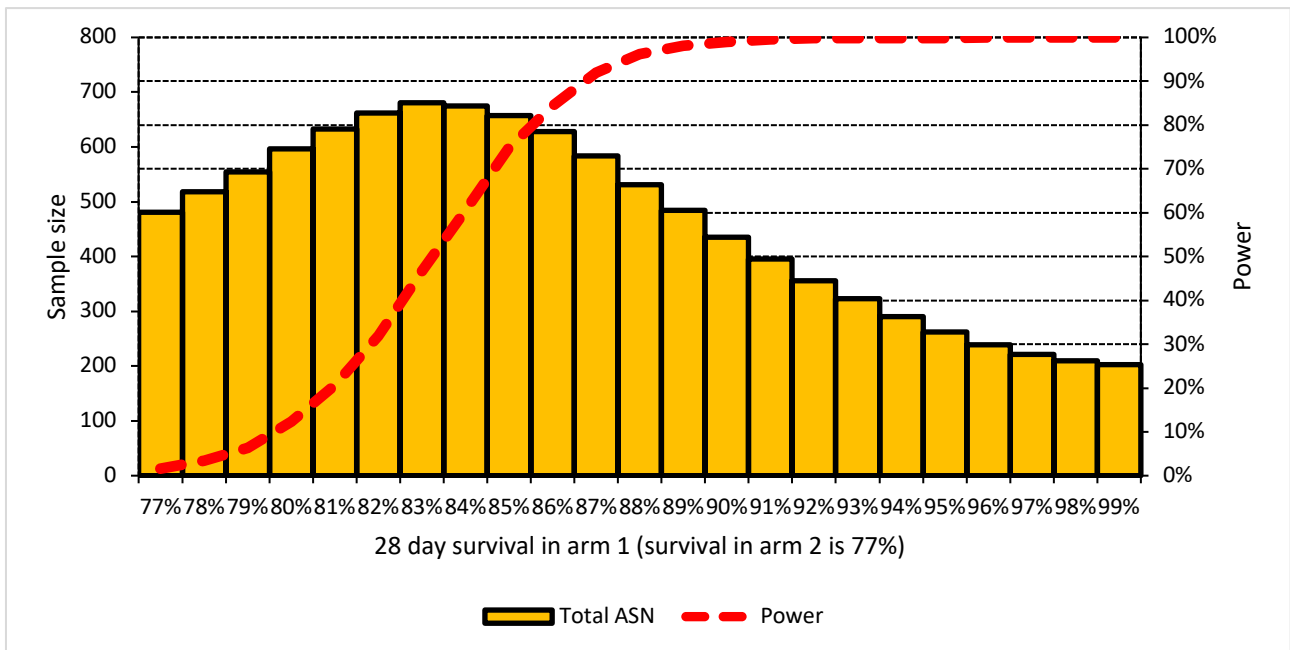

**Figure S5.** Adaptive sample size and power. The yellow bars represent the number of patients to be enrolled in the trial. Red dotted line shows the study power (i.e. the probability to detect a real difference between arm 1 and arm 2 if arm 1 is superior to arm 2). Simulation has been carried out assuming 1:1 ratio between arms; first analysis is carried out at 200 patients; adaptive sample size between 30-350 and p-value calculated according to Fisher's exact statistics; conditional power for the next analysis 90%; K=3 (i.e. 2 interim analysis and one final analysis).

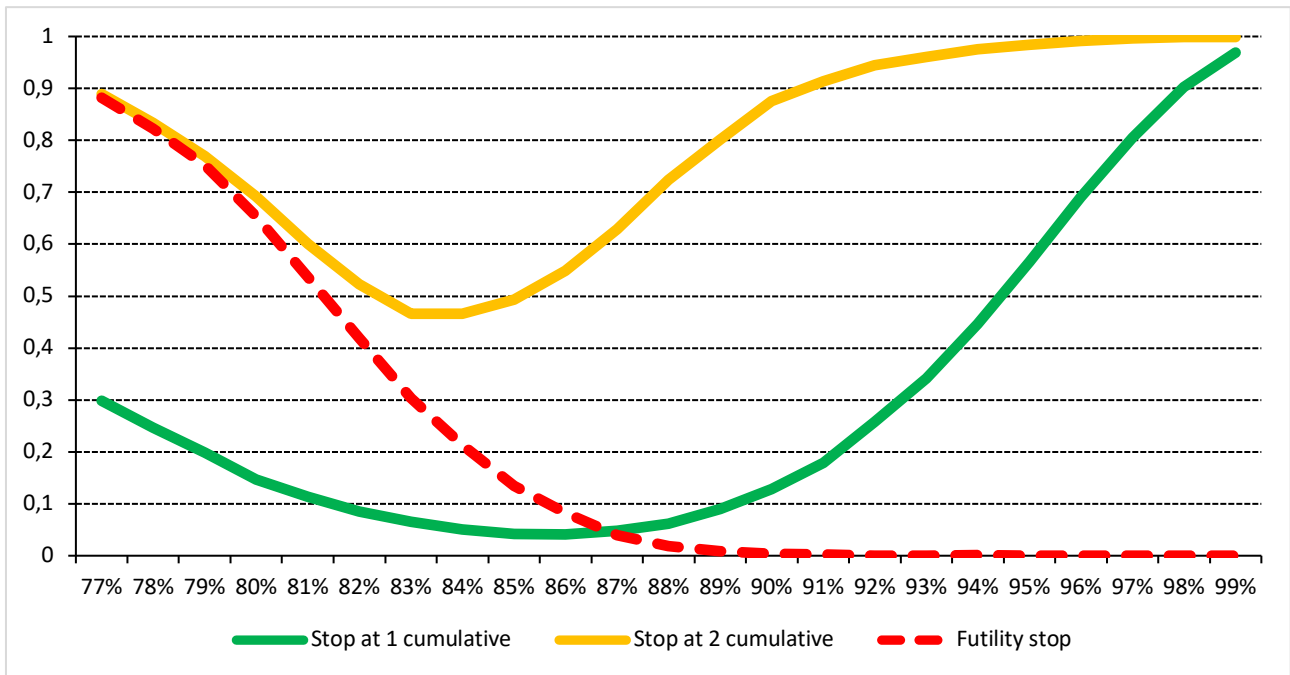

**Figure S6.** Cumulative probability of trial termination. Continuous lines show the cumulative probability of early termination either at first (green line) or second (yellow line) interim analysis. Early termination at both stages can be driven either by efficacy (i.e. reject  $H_0$ ) or futility (i.e. accept  $H_0$ ). The red dotted line shows the cumulative probability of termination for futility regardless of the stage of analysis (i.e. at first interim, second interim or final analysis).
